# Supplementary material for: β-Ga2O3 heterojunction field-effect transistors prepared via UV laser-assisted p-doping of two-dimensional WSe2
Source: Royal Society of Chemistry journal article supplement (doi:10.1039/d1tc06157g), 2022-01-01
Supplement: d1tc06157g1.pdf [file d1tc06157g1.pdf]

## Supplementary Information

### **$\beta$ -Ga<sub>2</sub>O<sub>3</sub> heterojunction field-effect transistors prepared *via* UV laser-assisted p-doping of two-dimensional WSe<sub>2</sub>**

Sanghyun Moon<sup>1,‡</sup>, Jinho Bae<sup>2,‡</sup>, and Jihyun Kim<sup>1,\*</sup>

<sup>1</sup> School of Chemical and Biological Engineering, Seoul National University, Seoul  
08826, South Korea

<sup>2</sup> Department of Chemical and Biological Engineering, Korea University, Seoul  
02841, South Korea

‡ These authors contributed equally to this work.

\*Corresponding author: Jihyun Kim ([jihyunkim@snu.ac.kr](mailto:jihyunkim@snu.ac.kr))

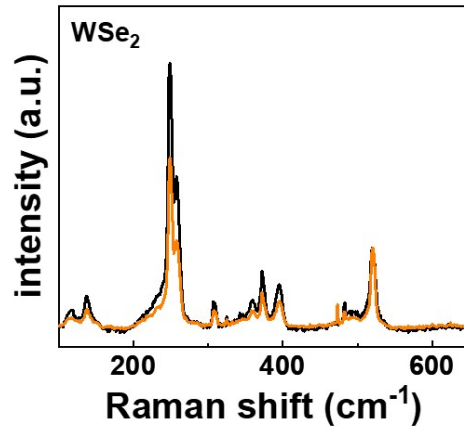

**Figure S1.** Raman spectra of WSe<sub>2</sub> before (black) and after (orange) UV laser treatment. The peak at ~520 cm<sup>-1</sup> originates from the Si substrate.

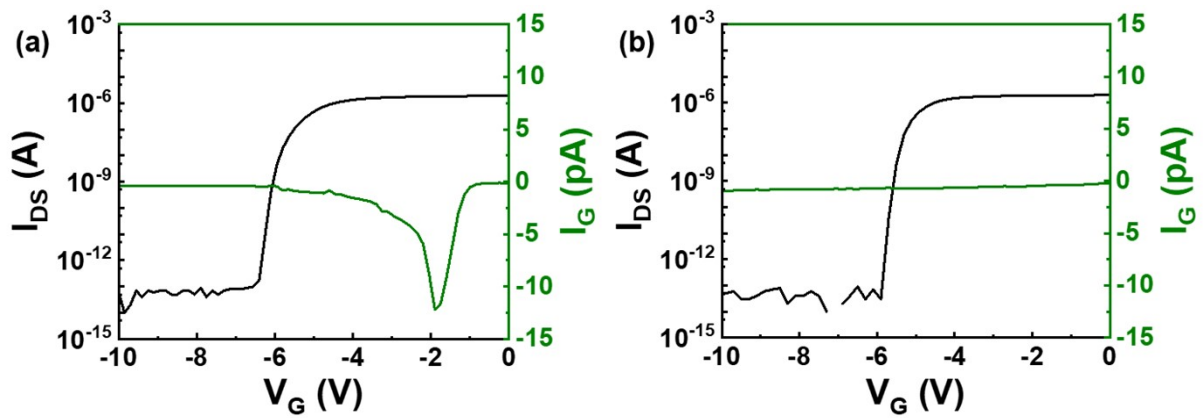

**Figure S2.**  $I_{DS}$  vs  $V_G$  and  $I_G$  vs  $V_G$  characteristics of the  $\beta$ -Ga<sub>2</sub>O<sub>3</sub> HJFET with WSe<sub>2</sub> top-gate (a) before and (b) after UV laser treatment.

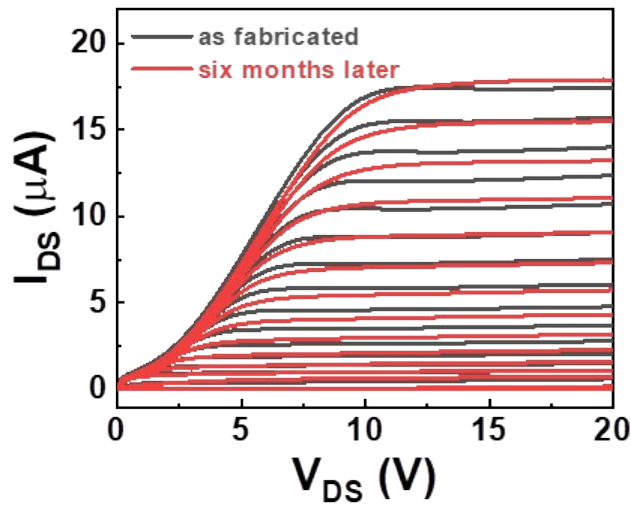

**Figure S3.** Comparison of the output characteristics ( $V_G = +1\text{ V to } -14\text{ V}$ ,  $-1\text{ V step}$ ) of the  $\beta\text{-Ga}_2\text{O}_3$  HJFET after the storage in an air ambience for 6 months.

| thickness                     | $\beta\text{-Ga}_2\text{O}_3$          | WSe <sub>2</sub>          |
|-------------------------------|----------------------------------------|---------------------------|
| $h$ (nm)                      | 393.3                                  | 20.5                      |
| contact resistance            | $\beta\text{-Ga}_2\text{O}_3$ to Ti/Au | WSe <sub>2</sub> to Pt/Au |
| $R_c$ ( $k\Omega\cdot\mu m$ ) | 8.26                                   | 55.8                      |

**Table S1.** The thickness of  $\beta\text{-Ga}_2\text{O}_3$  and WSe<sub>2</sub>, and the corresponding contact resistances
